# Supplementary material for: Apatites Record Sedimentary Provenance Change 4–5 Myrs Before Clay in the Oligocene/Miocene Alpine Molasse
Source: Frontiers journal article supplement (doi:10.3389/feart.2022.914409), 2022-06-14
Supplement: Data_Sheet_1.xlsx [file Data_Sheet_1.xlsx]

## Sheet: All_together
Grain_name	Sample group	TotalNd_V	Nd145_144mbc	Nd145_144mbc±2SE	147Sm_144Nd	147Sm_144Nd_2SE	147Sm_144Nd_2SE_prop	143Nd_144Nd	143Nd_144Nd_2SE	143Nd_144Nd_2SE_ prop	eNd	eNd_error	Apatite_Source_rock_discrimination
S3_2	BHU	5.1	0.348407	5.3e-05	0.25604	0.00035	0.0033	0.51208	0.00015	0.00016	-10.729	2.92609	HM
S3_4	BHU	2.41	0.348386	6.5e-05	0.2329	0.0013	0.0033	0.51227	0.00011	0.00013	-7.02261	2.1458	HM
S3_7	BHU	1.501	0.34838	9.3e-05	0.2715	0.0022	0.0042	0.51275	0.00018	0.00019	2.34087	3.5113	IM
S3_11	BHU	2.14	0.348441	6.3e-05	0.2549	0.0068	0.0076	0.51249	0.00013	0.00014	-2.73101	2.53594	HM
S3_15	BHU	1.02	0.348407	9.5e-05	0.2578	0.0015	0.0037	0.512	0.00018	0.00019	-12.2896	3.5113	HM
S3_42	BHU	2.87	0.348406	6e-05	0.1428	0.0012	0.0022	0.51218	0.00011	0.00012	-8.77826	2.1458	HM
G1a_4	G1	0.762	0.34853	0.00013	0.28662	0.00039	0.0038	0.51239	0.00016	0.00017	-4.68174	3.12116	LM
G1_34	G1	2.41	0.348389	4.6e-05	0.3513	0.0031	0.0055	0.51239	0.00013	0.00014	-4.68174	2.53594	HM
G1_35	G1	2.217	0.34846	4.5e-05	0.3491	0.0011	0.0048	0.512202	9.7e-05	0.00011	-8.3491	1.8922	IM
G1_42	G1	0.748	0.34845	0.00014	0.2982	0.002	0.0043	0.51235	0.00018	0.00019	-5.46203	3.5113	UM
G1a_5	G1	0.687	0.34842	0.00011	0.25148	0.00052	0.0034	0.51269	0.00019	0.0002	1.17043	3.70638	LM
G1a_8	G1	1.334	0.348431	6.9e-05	0.3574	0.0013	0.0049	0.51236	0.00011	0.00012	-5.26696	2.1458	LM
G1a_9	G1	0.882	0.348465	8.5e-05	0.30308	0.00022	0.004	0.51226	0.00015	0.00016	-7.21768	2.92609	LM
G1a_13	G1	4.465	0.348432	4.1e-05	0.26368	0.00024	0.0035	0.512227	7.4e-05	9.1e-05	-7.86142	1.44354	IM
G1a_15	G1	3.246	0.348401	4.2e-05	0.2646	0.0024	0.0042	0.512253	8.7e-05	0.0001	-7.35423	1.69713	IM
G1a_18	G1	1.527	0.348468	7.2e-05	0.2261	0.0017	0.0035	0.51258	0.0001	0.00012	-0.975362	1.95072	IM
G1a_21	G1	2.24	0.348468	6e-05	0.2694	0.0027	0.0045	0.512112	9.1e-05	0.00011	-10.1048	1.77516	IM
G1a_23	G1	0.961	0.34845	9.5e-05	0.2879	0.0043	0.0057	0.51236	0.00018	0.00019	-5.26696	3.5113	LM
G1a_27	G1	0.979	0.34837	0.00011	0.28347	0.00097	0.004	0.5124	0.00014	0.00015	-4.48667	2.73101	LM
G1a_28	G1	1.537	0.348464	7.6e-05	0.27177	0.00048	0.0038	0.51235	0.0001	0.00011	-5.46203	1.95072	HM
G1a_29	G1	1.235	0.348366	9.4e-05	0.34327	0.00019	0.004	0.51226	0.00016	0.00017	-7.21768	3.12116	LM
G1_3	G1	1.089	0.348383	8.6e-05	0.494	0.0017	0.0068	0.51277	0.00015	0.00016	2.73101	2.92609	HM
G1_5	G1	1.36	0.348371	8.2e-05	0.24468	0.00043	0.0033	0.51219	0.00013	0.00014	-8.58319	2.53594	IM
G1_13	G1	1.061	0.348569	9.7e-05	0.3783	0.0014	0.0052	0.51238	0.00015	0.00016	-4.87681	2.92609	IM
G1_16	G1	1.452	0.34845	8.8e-05	0.3341	0.001	0.0045	0.51225	0.00012	0.00013	-7.41275	2.34087	LM
G1_18	G1	0.66	0.34841	0.00014	0.3631	0.0024	0.0054	0.51251	0.0002	0.00021	-2.34087	3.90145	IM
G1_21	G1	0.952	0.3483	0.00011	0.2446	0.0016	0.0036	0.51238	0.00017	0.00018	-4.87681	3.31623	IM
G1_29	G1	0.901	0.34837	0.00011	0.3965	0.0035	0.0063	0.51194	0.00014	0.00015	-13.46	2.73101	LM
G1_30	G1	1.35	0.34836	0.00011	0.3102	0.0032	0.0051	0.5121	0.00017	0.00018	-10.3388	3.31623	IM
G1_32	G1	2.26	0.348382	5.6e-05	0.3528	0.0011	0.0049	0.51277	0.0001	0.00012	2.73101	1.95072	HM
G1_37	G1	1.455	0.348332	7.3e-05	0.4163	0.0014	0.0059	0.51194	0.00013	0.00014	-13.46	2.53594	IM
G1_38	G1	2.141	0.348467	4.9e-05	0.3654	0.0018	0.005	0.51213	0.00012	0.00013	-9.75362	2.34087	IM
G1_39	G1	1.395	0.348511	7.9e-05	0.4532	0.0012	0.006	0.51225	0.00015	0.00016	-7.41275	2.92609	LM
G1_41	G1	9.15	0.348409	2e-05	0.17153	0.00084	0.0023	0.512249	5.3e-05	7.6e-05	-7.43226	1.03388	IM
G1_48	G1	1.245	0.348539	8.4e-05	0.3679	0.0011	0.0054	0.51238	0.00016	0.00017	-4.87681	3.12116	HM
G1_56	G1	0.64	0.34858	0.00014	0.3246	0.0017	0.0043	0.51261	0.00019	0.0002	-0.390145	3.70638	LM
G1_57	G1	1.473	0.3485	8e-05	0.3377	0.0012	0.005	0.51276	0.00019	0.0002	2.53594	3.70638	HM
G1_59	G1	0.983	0.348399	9.6e-05	0.32948	0.0009	0.004	0.51217	0.00019	0.00019	-8.97333	3.70638	IM
G1_60	G1	1.1099	0.348448	8.6e-05	0.39193	0.0008	0.0048	0.51225	0.00014	0.00015	-7.41275	2.73101	LM
G1_63	G1	3.35	0.3484	4.7e-05	0.19884	0.00048	0.0026	0.512675	6.1e-05	8.1e-05	0.877826	1.18994	IM
G1_65	G1	1.834	0.348491	5.4e-05	0.31163	0.00059	0.0039	0.51264	0.00012	0.00013	0.195072	2.34087	HM
G1_66	G1	1.48	0.348425	7.4e-05	0.1487	0.0041	0.0045	0.51263	0.00013	0.00014	0	2.53594	IM
O1a_6	LPF1	0.95	0.348516	9.6e-05	0.2526	0.0051	0.0061	0.51248	0.00017	0.00018	-2.92609	3.31623	LM
O1a_41	LPF1	1.142	0.348454	7.6e-05	0.30572	0.00097	0.0042	0.51248	0.00016	0.00017	-2.92609	3.12116	HM
O1a_5	LPF1	1.441	0.348421	6.6e-05	0.19723	0.00055	0.0027	0.51277	0.00012	0.00013	2.73101	2.34087	IM
O1a_44	LPF1	0.773	0.34831	0.00012	0.1684	0.0043	0.0049	0.51228	0.00018	0.00019	-6.82754	3.5113	UM
O1a_11	LPF1	1.201	0.348496	9.4e-05	0.28172	0.00015	0.0034	0.51218	0.00012	0.00013	-8.77826	2.34087	LM
O1a_12	LPF1	1.349	0.348429	6.9e-05	0.39929	0.0008	0.0053	0.51261	0.00012	0.00013	-0.390145	2.34087	LM
O1a_13	LPF1	0.654	0.34848	0.00012	0.247	0.0024	0.004	0.51235	0.0002	0.0002	-5.46203	3.90145	LM
O1a_21	LPF1	0.915	0.348468	8.8e-05	0.2701	0.0011	0.0038	0.51232	0.00018	0.00019	-6.04725	3.5113	LM
O1a_22	LPF1	1.808	0.348457	5.5e-05	0.11102	0.00023	0.0015	0.51249	0.00013	0.00014	-2.73101	2.53594	UM
O1a_23	LPF1	4.21	0.348428	3.9e-05	0.1031	0.0014	0.002	0.51232	6.9e-05	8.7e-05	-6.04725	1.346	IM
O1a_25	LPF1	5.6	0.348464	2.7e-05	0.17083	0.00063	0.0024	0.51243	4.9e-05	7.3e-05	-3.90145	0.955855	IM
O1a_26	LPF1	0.797	0.34853	0.00011	0.2829	0.0016	0.0041	0.5126	0.0002	0.00021	-0.585217	3.90145	LM
O1a_28	LPF1	3.2	0.348434	5.6e-05	0.265	0.0096	0.01	0.512162	8.5e-05	0.0001	-9.12939	1.65812	LM
O1a_33	LPF1	1.28	0.348463	6.8e-05	0.281	0.012	0.012	0.51271	0.00013	0.00014	1.56058	2.53594	LM
O1a_34	LPF1	0.788	0.34852	0.00011	0.2742	0.0043	0.0056	0.5124	0.00018	0.00019	-4.48667	3.5113	LM
O1a_37	LPF1	1.167	0.348456	8e-05	0.2549	0.0037	0.005	0.51247	0.00013	0.00014	-3.12116	2.53594	LM
O1a_38	LPF1	1.48	0.348495	6e-05	0.228	0.015	0.015	0.51227	0.00014	0.00015	-7.02261	2.73101	LM
O1a_40	LPF1	1.445	0.348482	8.1e-05	0.30094	0.00054	0.0043	0.51237	0.00014	0.00015	-5.07188	2.73101	LM
O1a_47	LPF1	1.158	0.34845	0.0001	0.2714	0.0016	0.0039	0.5125	0.00014	0.00015	-2.53594	2.73101	LM
O1a_50	LPF1	1.143	0.348487	8.6e-05	0.2634	0.001	0.0037	0.51221	0.00012	0.00013	-8.19304	2.34087	LM
O1a_55	LPF1	1.955	0.348448	5e-05	0.2727	0.002	0.0041	0.5126	0.00011	0.00012	-0.585217	2.1458	HM
O1a_56	LPF1	2.355	0.348414	4.6e-05	0.29687	0.00082	0.004	0.512685	8.3e-05	9.9e-05	1.0729	1.6191	HM
O1_1	LPF1	0.841	0.3485	0.00011	0.2849	0.0014	0.004	0.51242	0.00019	0.00019	-4.09652	3.70638	HM
O1_3	LPF1	1.592	0.34853	7e-05	0.2862	0.0021	0.0043	0.51262	0.00012	0.00013	-0.195072	2.34087	IM
O1_6	LPF1	0.959	0.34851	0.0001	0.2889	0.0008	0.0039	0.51231	0.00015	0.00016	-6.24232	2.92609	LM
O1_12	LPF1	3.99	0.348472	4.2e-05	0.1963	0.0032	0.0041	0.512101	6.3e-05	8.3e-05	-10.3193	1.22896	IM
O1_16	LPF1	1.249	0.348504	9.1e-05	0.26446	0.00055	0.0039	0.51222	0.00016	0.00017	-7.99797	3.12116	LM
O1_22	LPF1	0.861	0.34842	0.00011	0.3098	0.0019	0.0045	0.51214	0.00016	0.00017	-9.55855	3.12116	LM
O1_23	LPF1	0.8066	0.348525	9.3e-05	0.27297	0.00016	0.0037	0.51244	0.0002	0.00021	-3.70638	3.90145	LM
O1_28	LPF1	1.054	0.348582	8.1e-05	0.2304	0.0096	0.01	0.51217	0.00015	0.00016	-8.97333	2.92609	UM
O1_29	LPF1	2.583	0.348515	4.6e-05	0.2073	0.0013	0.003	0.51253	0.0001	0.00011	-1.95072	1.95072	HM
O1_31	LPF1	1.054	0.348613	8.6e-05	0.12867	0.00036	0.0018	0.51252	0.00015	0.00016	-2.1458	2.92609	IM
O1_32	LPF1	1.499	0.348477	6e-05	0.31241	0.00047	0.0042	0.51246	0.00012	0.00013	-3.31623	2.34087	IM
O1_33	LPF1	2.91	0.348523	3.8e-05	0.23639	0.00063	0.0032	0.512192	5.7e-05	7.8e-05	-8.54417	1.11191	IM
O1_34	LPF1	0.815	0.34843	0.00011	0.3233	0.0026	0.005	0.51211	0.0002	0.0002	-10.1438	3.90145	LM
O1_36	LPF1	1.246	0.348507	8.8e-05	0.2149	0.0066	0.0072	0.51235	0.00014	0.00015	-5.46203	2.73101	LM
O1_37	LPF1	1.071	0.3486	0.00011	0.2544	0.0068	0.0075	0.51239	0.00019	0.00019	-4.68174	3.70638	LM
O1_42	LPF1	5.14	0.348493	2.8e-05	0.22883	0.00042	0.0031	0.512538	6.1e-05	8.1e-05	-1.79467	1.18994	HM
O1_47	LPF1	1.49	0.34849	0.00011	0.171	0.0014	0.0026	0.51203	0.00017	0.00018	-11.7043	3.31623	HM
O1_48	LPF1	1.063	0.348498	8.7e-05	0.263	0.0047	0.0059	0.5125	0.00017	0.00018	-2.53594	3.31623	LM
O1_49	LPF1	1.405	0.348394	8.6e-05	0.13963	0.00044	0.0019	0.51188	0.00013	0.00014	-14.6304	2.53594	LM
O1_51	LPF1	0.887	0.34845	8.6e-05	0.1875	0.0035	0.0042	0.51241	0.00019	0.0002	-4.29159	3.70638	LM
O1_53	LPF1	1.616	0.348451	5.5e-05	0.2878	0.00097	0.0041	0.51239	0.00011	0.00012	-4.68174	2.1458	IM
O1_61	LPF1	1.42	0.348464	8.8e-05	0.2631	0.0096	0.01	0.51238	0.00018	0.00019	-4.87681	3.5113	LM
O1_64	LPF1	0.992	0.348541	9.5e-05	0.247	0.009	0.0096	0.51236	0.00019	0.0002	-5.26696	3.70638	LM
O1_66	LPF1	2.083	0.348462	5.6e-05	0.2509	0.0026	0.0042	0.51224	9e-05	0.0001	-7.60783	1.75565	IM
B1_14	HFM	0.732	0.3484	0.00014	0.23779	0.00053	0.0011	0.51258	0.00019	0.00022	-0.975362	3.70638	LM
B1_12	HFM	2.658	0.348387	3.2e-05	0.19441	0.00047	0.00091	0.512421	8.2e-05	0.00014	-4.07701	1.59959	HM
B1_25	HFM	1.295	0.34843	0.00011	0.09542	0.00023	0.00045	0.51256	0.00013	0.00017	-1.36551	2.53594	IM
B1a_28	HFM	1.058	0.348393	9.7e-05	0.33461	0.0004	0.0027	0.51284	0.00015	0.00016	4.09652	2.92609	UM
B1_24	HFM	1.514	0.348447	8.2e-05	0.27972	0.00032	0.0012	0.51261	0.00014	0.00018	-0.390145	2.73101	HM
B1_29	HFM	2.77	0.348488	4.8e-05	0.22573	0.00023	0.00094	0.512622	9.4e-05	0.00015	-0.156058	1.83368	HM
B1_36	HFM	1.087	0.34844	0.00011	0.257	0.01	0.01	0.51236	0.0002	0.00023	-5.26696	3.90145	HM
B1_37	HFM	1.7	0.348478	7.9e-05	0.23291	0.0005	0.0011	0.51279	0.00012	0.00017	3.12116	2.34087	HM
B1_40	HFM	1.177	0.34853	0.00011	0.2858	0.0015	0.0019	0.51238	0.00016	0.00019	-4.87681	3.12116	HM
B1_41	HFM	0.954	0.348454	9.8e-05	0.27925	0.00064	0.0013	0.51288	0.00017	0.00021	4.87681	3.31623	HM
B1_44	HFM	2.347	0.348431	4.5e-05	0.10071	0.00049	0.00064	0.512548	7.2e-05	0.00013	-1.59959	1.40452	IM
B1_45	HFM	1.744	0.348445	5.4e-05	0.30436	0.00072	0.0014	0.51269	0.00011	0.00016	1.17043	2.1458	HM
B1_49	HFM	0.978	0.348386	8.7e-05	0.25583	0.0005	0.0011	0.51247	0.00016	0.0002	-3.12116	3.12116	HM
B1a_1	HFM	1.207	0.34846	0.00011	0.2746	0.0053	0.0058	0.51236	0.00015	0.00015	-5.26696	2.92609	HM
B1a_9	HFM	1.035	0.34846	0.00011	0.29729	0.00069	0.0025	0.51211	0.00015	0.00015	-10.1438	2.92609	HM
B1a_10	HFM	1.291	0.34849	0.00011	0.27713	0.00016	0.0022	0.51228	0.00016	0.00016	-6.82754	3.12116	HM
B1a_18	HFM	1.401	0.348503	9.5e-05	0.25576	0.0005	0.0021	0.5124	0.00014	0.00014	-4.48667	2.73101	HM
B1a_19	HFM	2.944	0.348435	5.9e-05	0.28426	0.00063	0.0024	0.512523	8.2e-05	8.7e-05	-2.08728	1.59959	HM
B1a_26	HFM	1.121	0.348435	7.9e-05	0.26287	0.00069	0.0022	0.51247	0.00014	0.00015	-3.12116	2.73101	HM
B1a_27	HFM	2.491	0.348402	5e-05	0.26561	0.00037	0.0022	0.51271	0.0001	0.00011	1.56058	1.95072	HM
S1a_2	LPF3	0.831	0.34852	0.00013	0.28	0.011	0.013	0.51246	0.00015	0.00015	-3.31623	2.92609	LM
S1a_4	LPF3	4.14	0.348437	4.1e-05	0.2616	0.0016	0.0062	0.512475	8.2e-05	9.1e-05	-3.02362	1.59959	HM
S1a_6	LPF3	1.271	0.348408	7.6e-05	0.33	0.012	0.014	0.51227	0.00015	0.00016	-7.02261	2.92609	IM
A1_6	LPF3	4.496	0.348454	2.3e-05	0.23564	0.0003	0.003	0.512195	5.4e-05	7.2e-05	-8.48565	1.05339	UM
S1a_5	LPF3	1.45	0.348325	6.2e-05	0.3023	0.0057	0.0091	0.51262	0.00014	0.00015	-0.195072	2.73101	HM
S1a_8	LPF3	1.37	0.348432	8.2e-05	0.2266	0.0064	0.0083	0.51204	0.00017	0.00017	-11.5093	3.31623	HM
S1a_9	LPF3	1.598	0.348386	6.2e-05	0.1677	0.00076	0.0039	0.51233	0.00013	0.00014	-5.85217	2.53594	IM
S1a_13	LPF3	3.86	0.348462	3.6e-05	0.2425	0.0035	0.0067	0.512347	7.8e-05	8.8e-05	-5.52055	1.52157	HM
S1a_17	LPF3	1.424	0.348456	6.8e-05	0.2688	0.0099	0.012	0.51268	0.00012	0.00013	0.975362	2.34087	HM
S1a_20	LPF3	2.44	0.348444	4e-05	0.301	0.0021	0.0075	0.51262	0.00011	0.00011	-0.195072	2.1458	HM
S1a_22	LPF3	1.718	0.34841	8.1e-05	0.2679	0.0046	0.0078	0.51247	0.00012	0.00012	-3.12116	2.34087	HM
S1a_24	LPF3	0.945	0.3485	0.00012	0.2689	0.0019	0.0065	0.51219	0.00019	0.00019	-8.58319	3.70638	IM
S1a_25	LPF3	2.68	0.348446	4.8e-05	0.13641	0.00021	0.003	0.5123	0.00011	0.00012	-6.43739	2.1458	IM
S1a_26	LPF3	0.843	0.34847	0.00011	0.29809	0.00086	0.0068	0.51212	0.00017	0.00018	-9.9487	3.31623	HM
S1a_27	LPF3	1.383	0.348405	7.7e-05	0.2611	0.0035	0.0071	0.51254	0.00015	0.00015	-1.75565	2.92609	HM
S1a_29	LPF3	3.4	0.348435	4.3e-05	0.1917	0.0011	0.0045	0.512342	9.8e-05	0.00011	-5.61809	1.91171	IM
S1a_30	LPF3	1.011	0.348505	9.8e-05	0.2777	0.0018	0.0068	0.5125	0.00018	0.00018	-2.53594	3.5113	HM
S1a_31	LPF3	0.75	0.3484	0.00011	0.3618	0.0028	0.0087	0.51258	0.00017	0.00018	-0.975362	3.31623	HM
S1a_32	LPF3	3.02	0.348396	2.9e-05	0.24489	0.00064	0.0057	0.512446	7.9e-05	8.9e-05	-3.58933	1.54107	HM
S1a_36	LPF3	1.94	0.348506	7.3e-05	0.13024	0.00031	0.003	0.51234	0.00013	0.00014	-5.6571	2.53594	IM
S1a_39	LPF3	2.12	0.348447	7.3e-05	0.09831	0.0007	0.0024	0.51264	0.00015	0.00015	0.195072	2.92609	IM
S1a_40	LPF3	1.45	0.348481	7.3e-05	0.2118	0.002	0.0053	0.51243	0.00017	0.00017	-3.90145	3.31623	LM
S1a_41	LPF3	0.808	0.34853	0.0001	0.262	0.018	0.019	0.51258	0.00016	0.00017	-0.975362	3.12116	LM
S1a_44	LPF3	1.02	0.348454	9.6e-05	0.244	0.022	0.023	0.51247	0.00018	0.00019	-3.12116	3.5113	LM
S1a_45	LPF3	1.23	0.34844	6.8e-05	0.228	0.013	0.014	0.5126	0.00016	0.00016	-0.585217	3.12116	HM
S1a_46	LPF3	2.07	0.34848	6.4e-05	0.256	0.0012	0.0061	0.512514	9.7e-05	0.0001	-2.26284	1.8922	HM
S1a_47	LPF3	1.731	0.348453	6.8e-05	0.2762	0.0037	0.0074	0.51266	0.00012	0.00013	0.585217	2.34087	HM
S1a_48	LPF3	1.644	0.348516	6.9e-05	0.2497	0.0053	0.0078	0.51256	0.00012	0.00013	-1.36551	2.34087	HM
S1a_51	LPF3	2.45	0.348505	4.8e-05	0.2666	0.0025	0.0066	0.51251	0.00012	0.00013	-2.34087	2.34087	HM
S1a_52	LPF3	1.165	0.348408	9e-05	0.236	0.0073	0.0091	0.51202	0.00015	0.00016	-11.8994	2.92609	HM
S1a_53	LPF3	1.886	0.348505	5.5e-05	0.2508	0.0073	0.0093	0.51262	0.00011	0.00012	-0.195072	2.1458	HM
S1a_54	LPF3	1.6	0.348492	7.2e-05	0.215	0.014	0.015	0.51246	0.00016	0.00017	-3.31623	3.12116	HM
S1a_55	LPF3	1.54	0.348469	8e-05	0.2741	0.0073	0.0097	0.51251	0.00011	0.00012	-2.34087	2.1458	HM
S1a_58	LPF3	3.13	0.348459	6e-05	0.2019	0.0039	0.0061	0.51246	0.00011	0.00012	-3.31623	2.1458	HM
S1a_59	LPF3	2.59	0.348454	5e-05	0.251	0.011	0.013	0.51249	0.00012	0.00012	-2.73101	2.34087	IM
S1a_62	LPF3	0.996	0.348498	8.6e-05	0.2517	0.0097	0.011	0.51244	0.00013	0.00013	-3.70638	2.53594	LM
S1a_63	LPF3	1.75	0.348408	6.9e-05	0.2541	0.0028	0.0066	0.51234	0.00013	0.00013	-5.6571	2.53594	HM
E1_43	E1	0.829	0.34846	0.00011	0.1967	0.0079	0.0092	0.51225	0.00018	0.00018	-7.41275	3.5113	LM
E1_38	E1	1.851	0.348403	5.4e-05	0.2279	0.0025	0.0059	0.512613	9.5e-05	0.0001	-0.331623	1.85319	HM
E1_39	E1	2.64	0.348421	4.2e-05	0.1342	0.0061	0.0069	0.51242	0.00011	0.00012	-4.09652	2.1458	IM
E1_162	E1	4.413	0.348443	2.7e-05	0.32694	0.00076	0.0075	0.512179	5.4e-05	6.7e-05	-8.79777	1.05339	UM
E1_49	E1	1.131	0.348386	8.1e-05	0.2226	0.001	0.0052	0.51257	0.00015	0.00016	-1.17043	2.92609	LM
E1_50	E1	1.315	0.348465	7.7e-05	0.2303	0.0057	0.0078	0.51221	0.00014	0.00014	-8.19304	2.73101	LM
E1_52	E1	3.02	0.348412	5.1e-05	0.21434	0.00055	0.005	0.512531	9.1e-05	9.9e-05	-1.93122	1.77516	HM
E1_53	E1	0.926	0.34842	9.8e-05	0.2305	0.0022	0.0058	0.51246	0.00015	0.00015	-3.31623	2.92609	HM
E1_54	E1	0.97	0.34843	0.00012	0.1965	0.0057	0.0073	0.51231	0.00015	0.00016	-6.24232	2.92609	LM
E1_58	E1	1.501	0.348393	6.9e-05	0.2326	0.0031	0.0062	0.51232	0.00011	0.00012	-6.04725	2.1458	IM
E1_60	E1	1.093	0.348514	9.9e-05	0.2227	0.0038	0.0064	0.51267	0.00017	0.00017	0.78029	3.31623	LM
E1_68	E1	4.52	0.348423	3.1e-05	0.22349	0.00038	0.0052	0.512434	7.8e-05	8.7e-05	-3.82342	1.52157	HM
E1_70	E1	1.56	0.348397	6.2e-05	0.2267	0.003	0.0061	0.51219	0.00013	0.00013	-8.58319	2.53594	HM
E1_72	E1	4.18	0.348444	2.8e-05	0.24957	0.00054	0.0059	0.512618	5.6e-05	6.8e-05	-0.234087	1.09241	HM
E1_73	E1	5.32	0.348423	2.8e-05	0.3351	0.0019	0.0081	0.512779	4.9e-05	6.3e-05	2.90658	0.955855	HM
E1_74	E1	1.142	0.348444	7.9e-05	0.3026	0.0023	0.0074	0.51216	0.00012	0.00013	-9.16841	2.34087	LM
E1_75	E1	1.484	0.348493	7.7e-05	0.27493	0.00092	0.0065	0.5126	0.00012	0.00012	-0.585217	2.34087	LM
E1_80	E1	1.416	0.348377	6.5e-05	0.3392	0.0031	0.0085	0.512024	9.7e-05	0.0001	-11.8214	1.8922	LM
E1_81	E1	1.173	0.348367	7.7e-05	0.2822	0.0022	0.0069	0.51237	0.00013	0.00013	-5.07188	2.53594	LM
E1_82	E1	4.95	0.348455	3.1e-05	0.2859	0.0015	0.0069	0.512672	6.4e-05	7.5e-05	0.819304	1.24846	HM
E1_85	E1	3.99	0.348439	2.9e-05	0.27977	0.0009	0.0064	0.512609	6.8e-05	7.8e-05	-0.409652	1.32649	HM
E1_87	E1	1.378	0.348299	7.9e-05	0.3288	0.005	0.0092	0.51239	0.00017	0.00018	-4.68174	3.31623	LM
E1_91	E1	1.97	0.348374	5.6e-05	0.2451	0.0042	0.0071	0.51218	0.00012	0.00013	-8.77826	2.34087	HM
E1_95	E1	1.69	0.348509	6.3e-05	0.28682	0.00072	0.0067	0.51266	0.00012	0.00012	0.585217	2.34087	HM
E1_96	E1	1.66	0.348518	6.9e-05	0.859	0.02	0.028	0.5125	0.00014	0.00015	-2.53594	2.73101	LM
E1_98	E1	1.48	0.348538	9.2e-05	0.2605	0.0051	0.008	0.51208	0.00017	0.00018	-10.729	3.31623	LM
E1_99	E1	4.86	0.348446	2.9e-05	0.23421	0.00086	0.0055	0.512418	5e-05	6.4e-05	-4.13554	0.975362	HM
E1_103	E1	3.42	0.348434	4.2e-05	0.266	0.0014	0.0064	0.51224	9.3e-05	0.0001	-7.60783	1.81417	HM
E1_104	E1	2.759	0.348426	4.8e-05	0.3365	0.0021	0.0082	0.512523	7.9e-05	8.9e-05	-2.08728	1.54107	IM
E1_106	E1	2.079	0.348345	5.2e-05	0.2516	0.0032	0.0067	0.51261	0.00011	0.00012	-0.390145	2.1458	LM
E1_107	E1	2.342	0.348465	5.2e-05	0.24192	0.00046	0.0057	0.512631	7.6e-05	8.5e-05	0.0195072	1.48255	IM
E1_108	E1	3.89	0.348439	3.8e-05	0.24501	0.00069	0.0056	0.512304	7.8e-05	8.7e-05	-6.35936	1.52157	HM
E1_109	E1	1.889	0.348331	4.3e-05	0.25158	0.00082	0.0059	0.512271	7.9e-05	8.9e-05	-7.0031	1.54107	LM
E1_110	E1	6.02	0.348378	2.6e-05	0.273	0.0017	0.0066	0.512531	4.9e-05	6.3e-05	-1.93122	0.955855	HM
E1_111	E1	8.46	0.348418	2.4e-05	0.2326	0.0011	0.0055	0.512291	6.3e-05	7.4e-05	-6.61296	1.22896	HM
E1_114	E1	0.822	0.34854	0.00013	0.2698	0.0021	0.0066	0.5121	0.00019	0.00019	-10.3388	3.70638	LM
E1_118	E1	12.6	0.348399	2.1e-05	0.11522	0.00035	0.0027	0.51222	6.1e-05	7.3e-05	-7.99797	1.18994	IM
E1_121	E1	2.121	0.348351	5.4e-05	0.2564	0.0033	0.0068	0.512432	7.2e-05	8.2e-05	-3.86243	1.40452	LM
E1_123	E1	2.154	0.348414	4.7e-05	0.267	0.0024	0.0066	0.512131	7.8e-05	8.7e-05	-9.73412	1.52157	HM
E1_126	E1	1.969	0.348386	5.6e-05	0.3255	0.0048	0.0089	0.51268	0.00011	0.00012	0.975362	2.1458	HM
E1_127	E1	3.18	0.34843	3.5e-05	0.2914	0.0021	0.007	0.512558	9.5e-05	0.0001	-1.40452	1.85319	HM
E1_128	E1	2.292	0.348434	5e-05	0.2307	0.0044	0.0069	0.512286	8.1e-05	9e-05	-6.71049	1.58009	LM
E1_131	E1	2.077	0.348413	5e-05	0.31	0.0038	0.0081	0.512605	8.5e-05	9.3e-05	-0.487681	1.65812	LM
E1_133	E1	1.579	0.348413	6.3e-05	0.5398	0.0053	0.014	0.51241	0.00012	0.00012	-4.29159	2.34087	LM
E1_136	E1	7.14	0.348411	2.5e-05	0.28162	0.00067	0.0054	0.512382	5.9e-05	7.1e-05	-4.8378	1.15093	IM
E1_137	E1	2.679	0.348486	4.4e-05	0.4842	0.0023	0.011	0.512482	7.9e-05	8.9e-05	-2.88707	1.54107	HM
E1_139	E1	6.344	0.348421	2.6e-05	0.53287	0.00069	0.01	0.512632	4.8e-05	6.2e-05	0.0390145	0.936348	HM
E1_141	E1	2.17	0.348375	6.8e-05	0.4973	0.0022	0.011	0.5122	0.00011	0.00012	-8.38812	2.1458	IM
E1_142	E1	2.01	0.348435	6.8e-05	0.4886	0.0028	0.011	0.51249	0.00013	0.00014	-2.73101	2.53594	HM
E1_143	E1	2.6	0.348401	5.8e-05	0.6581	0.0077	0.017	0.51208	0.00013	0.00014	-10.729	2.53594	IM
E1_144	E1	1.014	0.348416	9.6e-05	0.5681	0.009	0.016	0.5127	0.00017	0.00018	1.36551	3.31623	HM
E1_145	E1	1.1	0.34827	0.00012	0.4887	0.0025	0.011	0.51231	0.00016	0.00016	-6.24232	3.12116	HM
E1_147	E1	2.685	0.348361	4.4e-05	0.4456	0.0056	0.012	0.512672	9.8e-05	0.00011	0.819304	1.91171	HM
E1_149	E1	2.13	0.348415	4.6e-05	0.5115	0.0071	0.014	0.512091	8.7e-05	9.5e-05	-10.5144	1.69713	LM
E1_151	E1	2.053	0.348495	4.7e-05	0.4491	0.0024	0.011	0.512185	9.5e-05	0.0001	-8.68072	1.85319	LM
E1_153	E1	1.057	0.348397	8.4e-05	0.439	0.012	0.016	0.5123	0.00016	0.00017	-6.43739	3.12116	LM
E1_154	E1	4.26	0.348419	3.3e-05	0.3511	0.0021	0.0091	0.51244	0.0001	0.00011	-3.70638	1.95072	HM
E1_155	E1	7.94	0.348397	2.7e-05	0.29326	0.00079	0.006	0.512314	6.7e-05	7.7e-05	-6.16429	1.30699	IM
E1_156	E1	2.011	0.348466	4.3e-05	0.2641	0.0016	0.007	0.51214	9.6e-05	0.0001	-9.55855	1.8727	HM
E1_160	E1	1.762	0.348421	5.7e-05	0.3954	0.0019	0.0093	0.512272	9.3e-05	0.0001	-6.98359	1.81417	LM
E1_161	E1	2.687	0.348404	4.3e-05	0.31155	0.00029	0.005	0.512502	8.7e-05	9.6e-05	-2.49693	1.69713	IM
E1_163	E1	4.907	0.348422	2.7e-05	0.3707	0.0013	0.009	0.512599	6.3e-05	7.4e-05	-0.604725	1.22896	HM
E1_164	E1	2.194	0.34846	5.2e-05	0.3386	0.0019	0.0086	0.512345	8.2e-05	9.1e-05	-5.55957	1.59959	HM
E1_165	E1	2.9	0.348441	4.9e-05	0.35733	0.0008	0.0074	0.512419	8.5e-05	9.3e-05	-4.11603	1.65812	HM
E1_169	E1	2.541	0.348393	4.6e-05	0.357	0.0053	0.01	0.512668	7.5e-05	8.5e-05	0.741275	1.46304	LM
E1a_5	E1	1.944	0.348395	5.4e-05	0.2917	0.0017	0.0029	0.51258	0.00012	0.00012	-0.975362	2.34087	HM
E1a_9	E1	0.947	0.34851	0.00011	0.307	0.013	0.013	0.51248	0.00018	0.00018	-2.92609	3.5113	LM
E1a_10	E1	1.122	0.348424	9.6e-05	0.2321	0.0036	0.0041	0.51245	0.00016	0.00016	-3.5113	3.12116	LM
E1a_20	E1	2.72	0.348386	4.7e-05	0.113	0.0013	0.0016	0.51254	0.00011	0.00012	-1.75565	2.1458	IM
E1a_23	E1	1.649	0.3484	6.7e-05	0.2149	0.0022	0.0028	0.51246	0.00011	0.00011	-3.31623	2.1458	HM
E1a_27	E1	4.31	0.34841	5.9e-05	0.17597	0.00094	0.0017	0.51226	0.00018	0.00018	-7.21768	3.5113	HM
E1a_29	E1	0.9157	0.34853	0.00011	0.2792	0.0013	0.0026	0.51282	0.00015	0.00015	3.70638	2.92609	HM
E1a_30	E1	1.252	0.34845	0.00011	0.23997	0.00087	0.0021	0.51204	0.00013	0.00014	-11.5093	2.53594	LM
E1a_32	E1	1.823	0.348353	7.4e-05	0.3262	0.0055	0.0061	0.51278	0.00014	0.00014	2.92609	2.73101	HM
E1a_33	E1	3.185	0.348424	5e-05	0.17089	0.0002	0.0014	0.51239	0.0001	0.00011	-4.68174	1.95072	HM
E1a_35	E1	1.675	0.348405	4.9e-05	0.2782	0.0028	0.0036	0.512774	9.5e-05	9.9e-05	2.80904	1.85319	HM
E1a_38	E1	2.198	0.348426	4.3e-05	0.2325	0.002	0.0028	0.512591	7.9e-05	8.4e-05	-0.760783	1.54107	HM
E1a_40	E1	1.344	0.348428	7.5e-05	0.2552	0.0026	0.0033	0.5127	0.00016	0.00016	1.36551	3.12116	HM
E1a_43	E1	1.926	0.348381	5.4e-05	0.2751	0.0034	0.004	0.51253	0.00011	0.00012	-1.95072	2.1458	HM
E1a_50	E1	2.52	0.348418	5.7e-05	0.2486	0.0033	0.0038	0.51254	0.00013	0.00013	-1.75565	2.53594	HM
E1a_51	E1	0.658	0.34852	0.00013	0.225	0.0022	0.0029	0.51239	0.00015	0.00016	-4.68174	2.92609	LM
E1a_53	E1	0.896	0.34841	0.0001	0.2612	0.0053	0.0057	0.51248	0.00015	0.00016	-2.92609	2.92609	LM
E1a_54	E1	1.313	0.348391	8.5e-05	0.2175	0.0089	0.0091	0.51242	0.00017	0.00017	-4.09652	3.31623	HM
E1a_55	E1	0.932	0.348395	8.8e-05	0.2861	0.0094	0.0097	0.51224	0.00013	0.00014	-7.60783	2.53594	HM
E1a_56	E1	2.578	0.348389	6.6e-05	0.2176	0.0011	0.0021	0.51252	0.0001	0.00011	-2.1458	1.95072	HM
E1a_57	E1	1.762	0.348516	5.8e-05	0.3074	0.0017	0.003	0.512137	9.7e-05	0.0001	-9.61707	1.8922	IM
R1_1	LPF1	2.95	0.348453	4.3e-05	0.28668	0.00029	0.0066	0.512671	6.4e-05	7.5e-05	0.799797	1.24846	HM
R1_2	LPF1	4.332	0.348464	3.1e-05	0.29471	0.00064	0.0069	0.512685	6.7e-05	7.8e-05	1.0729	1.30699	HM
R1_3	LPF1	2.631	0.348441	5.2e-05	0.26259	0.00069	0.0062	0.512473	7.6e-05	8.6e-05	-3.06264	1.48255	LM
R1_4	LPF1	2.3	0.348475	4.1e-05	0.3292	0.0019	0.0079	0.51256	0.00012	0.00012	-1.36551	2.34087	HM
R1_5	LPF1	0.934	0.348459	9.3e-05	0.3141	0.0011	0.0075	0.51237	0.00016	0.00016	-5.07188	3.12116	LM
R1_7	LPF1	3.11	0.348452	3.7e-05	0.2566	0.0012	0.0061	0.512358	8.1e-05	9e-05	-5.30597	1.58009	HM
R1_8	LPF1	1.766	0.348354	6.4e-05	0.27077	0.00056	0.0063	0.512627	9.2e-05	0.0001	-0.0585217	1.79467	IM
R1_9	LPF1	3.919	0.348396	3.6e-05	0.30675	0.00088	0.0073	0.512618	7.5e-05	8.4e-05	-0.234087	1.46304	HM
R1_10	LPF1	0.853	0.348431	8.1e-05	0.2749	0.0011	0.0065	0.51252	0.00018	0.00018	-2.1458	3.5113	LM
R1_11	LPF1	2.347	0.348401	7.1e-05	0.2523	0.0011	0.006	0.51266	0.00019	0.00019	0.585217	3.70638	HM
R1_12	LPF1	2.252	0.348435	4.6e-05	0.441	0.0035	0.011	0.512432	7.1e-05	8.1e-05	-3.86243	1.38501	LM
R1_13	LPF1	1.137	0.34839	8.3e-05	0.2303	0.0033	0.0063	0.51231	0.00014	0.00015	-6.24232	2.73101	LM
R1_14	LPF1	3.12	0.348417	4.3e-05	0.2647	0.0015	0.0063	0.512372	8.1e-05	9e-05	-5.03287	1.58009	HM
R1_21	LPF1	3.08	0.348391	3.9e-05	0.3126	0.0011	0.0074	0.512374	7.5e-05	8.4e-05	-4.99386	1.46304	IM
L1_20	LPF2	2.284	0.348466	4.4e-05	0.36454	0.00051	0.003	0.512903	7.6e-05	8.1e-05	5.32548	1.48255	LM
L1_21	LPF2	1.027	0.348473	9.4e-05	0.5791	0.0033	0.0057	0.51282	0.00012	0.00012	3.70638	2.34087	HM
L1_9	LPF2	0.866	0.348513	9.9e-05	0.291	0.009	0.0093	0.51208	0.00016	0.00016	-10.729	3.12116	IM
L1_10	LPF2	2.65	0.348419	7.5e-05	0.2614	0.0057	0.0061	0.51218	0.00014	0.00014	-8.77826	2.73101	IM
L1_11	LPF2	1.339	0.34844	6.3e-05	0.332	0.011	0.012	0.51234	0.00011	0.00011	-5.6571	2.1458	LM
L1_13	LPF2	1.015	0.34845	0.0001	0.3249	0.0047	0.0053	0.51272	0.00019	0.00019	1.75565	3.70638	LM
L1_24	LPF2	1.3152	0.348431	7.3e-05	0.27554	0.00045	0.0023	0.5123	0.00014	0.00014	-6.43739	2.73101	IM
L1_25	LPF2	0.951	0.34843	0.00011	0.2325	0.0052	0.0056	0.51218	0.00018	0.00018	-8.77826	3.5113	HM
L1_26	LPF2	0.891	0.348509	9.5e-05	0.208	0.014	0.014	0.51216	0.00019	0.0002	-9.16841	3.70638	HM
L1_27	LPF2	0.734	0.34848	0.00013	0.2098	0.0077	0.0079	0.51223	0.00014	0.00015	-7.8029	2.73101	LM
L1_28	LPF2	1.588	0.348327	5.5e-05	0.271	0.0023	0.0032	0.51243	0.00011	0.00011	-3.90145	2.1458	HM
L1_31	LPF2	0.565	0.34836	0.00012	0.27	0.011	0.011	0.51222	0.00019	0.0002	-7.99797	3.70638	LM
L1_35	LPF2	1.303	0.348483	7.8e-05	0.2805	0.0067	0.0071	0.51227	0.00013	0.00014	-7.02261	2.53594	LM
L1_38	LPF2	1.231	0.348532	7.5e-05	0.287	0.014	0.014	0.51238	0.00012	0.00012	-4.87681	2.34087	LM
L1_40	LPF2	1.831	0.348402	4.7e-05	0.2774	0.0041	0.0046	0.51253	0.00011	0.00012	-1.95072	2.1458	HM
L1_46	LPF2	1.437	0.348413	5.9e-05	0.248	0.0098	0.01	0.51257	0.00012	0.00012	-1.17043	2.34087	HM
L1_48	LPF2	3.177	0.348415	3.3e-05	0.3069	0.0033	0.0041	0.512751	6.8e-05	7.4e-05	2.36038	1.32649	HM
L1a_3	LPF2	2.217	0.348465	4.5e-05	0.28701	0.0008	0.0025	0.512624	7.7e-05	8.2e-05	-0.117043	1.50206	HM
L1a_4	LPF2	0.943	0.34844	0.00011	0.2558	0.0012	0.0024	0.51255	0.00018	0.00018	-1.56058	3.5113	LM
L1a_6	LPF2	1.85	0.348445	5.2e-05	0.328	0.0033	0.0042	0.512731	8.8e-05	9.3e-05	1.97023	1.71664	HM
L1a_7	LPF2	1.865	0.348374	6.3e-05	0.29982	0.00036	0.0024	0.512639	8.8e-05	9.3e-05	0.175565	1.71664	HM
L1a_10	LPF2	4.138	0.348401	3.2e-05	0.24747	0.00059	0.0021	0.512283	6.7e-05	7.4e-05	-6.76901	1.30699	IM
L1a_12	LPF2	1.485	0.348422	6.6e-05	0.21345	0.00015	0.0017	0.512455	9.5e-05	0.0001	-3.41377	1.85319	IM
L1a_13	LPF2	2.8	0.348341	6.2e-05	0.1215	0.0037	0.0038	0.51212	0.00019	0.0002	-9.9487	3.70638	IM
L1a_14	LPF2	1.172	0.348503	7.5e-05	0.2979	0.0066	0.007	0.51224	0.00015	0.00015	-7.60783	2.92609	LM
L1a_15	LPF2	4.09	0.34843	4.8e-05	0.1558	0.0012	0.0017	0.51238	8.1e-05	8.6e-05	-4.87681	1.58009	HM
L1a_17	LPF2	1.002	0.34845	7.3e-05	0.29478	0.0009	0.0025	0.51251	0.00012	0.00013	-2.34087	2.34087	LM
L1a_18	LPF2	1.832	0.348492	5.3e-05	0.18346	0.00031	0.0015	0.512662	8.8e-05	9.3e-05	0.624232	1.71664	LM
L1a_21	LPF2	1.732	0.348454	4.8e-05	0.24638	0.00032	0.002	0.512637	8.1e-05	8.6e-05	0.136551	1.58009	HM
L1a_22	LPF2	0.892	0.348459	9.7e-05	0.294	0.011	0.011	0.51231	0.00016	0.00016	-6.24232	3.12116	LM
L1a_23	LPF2	1.113	0.348395	7.5e-05	0.311	0.018	0.018	0.51226	0.00013	0.00013	-7.21768	2.53594	LM
L1a_24	LPF2	0.715	0.348366	9.5e-05	0.2771	0.0021	0.0031	0.51224	0.00017	0.00017	-7.60783	3.31623	LM
L1a_27	LPF2	1.298	0.348432	6.8e-05	0.28	0.0051	0.0056	0.51256	0.00012	0.00012	-1.36551	2.34087	LM
L1a_28	LPF2	1.056	0.348427	7.9e-05	0.2922	0.0018	0.003	0.51224	0.00014	0.00014	-7.60783	2.73101	HM
L1a_30	LPF2	0.944	0.348409	7.2e-05	0.2067	0.004	0.0043	0.51254	0.00015	0.00015	-1.75565	2.92609	HM
L1a_34	LPF2	1.2	0.348451	6.4e-05	0.2962	0.0015	0.0028	0.51237	0.00013	0.00013	-5.07188	2.53594	HM
L1a_36	LPF2	0.7	0.348419	9.8e-05	0.256	0.012	0.012	0.51228	0.00018	0.00018	-6.82754	3.5113	LM
L1a_37	LPF2	0.763	0.34844	0.00012	0.3146	0.0012	0.0028	0.51237	0.00018	0.00018	-5.07188	3.5113	LM
L1a_38	LPF2	0.71	0.34852	0.00011	0.4241	0.0041	0.0053	0.51312	0.00014	0.00015	9.55855	2.73101	LM
L1a_40	LPF2	0.7749	0.348413	9.2e-05	0.28498	0.0008	0.0024	0.51285	0.00017	0.00018	4.29159	3.31623	IM
L1a_42	LPF2	0.821	0.348486	8.2e-05	0.2359	0.0027	0.0033	0.5125	0.00014	0.00014	-2.53594	2.73101	LM
L1a_44	LPF2	1.582	0.348453	5e-05	0.286	0.0017	0.0029	0.51271	8.6e-05	9.1e-05	1.56058	1.67762	HM
I1_2	He4	3.097	0.348429	3.6e-05	0.27044	0.00017	0.0022	0.512458	7.2e-05	7.8e-05	-3.35525	1.40452	HM
I1_8	He4	1.613	0.348401	5.7e-05	0.32	0.0014	0.0029	0.512659	9.7e-05	0.0001	0.56571	1.8922	IM
I1_1	He4	2.665	0.348413	4.3e-05	0.225656	9.7e-05	0.0018	0.511959	8.2e-05	8.7e-05	-13.0894	1.59959	UM
I1_6	He4	1.78	0.348419	6.7e-05	0.26	0.017	0.017	0.51261	0.00015	0.00016	-0.390145	2.92609	HM
I1_9	He4	5.106	0.348393	3.1e-05	0.26681	0.00026	0.0022	0.512659	5.7e-05	6.4e-05	0.56571	1.11191	HM
I1_10	He4	1.4601	0.348491	7.8e-05	0.3368	0.00051	0.0028	0.51272	0.00011	0.00011	1.75565	2.1458	HM
I1_11	He4	1.461	0.348416	8.1e-05	0.24247	0.00038	0.002	0.51233	0.00013	0.00013	-5.85217	2.53594	IM
I1_27	He4	1.843	0.348388	6.3e-05	0.2615	0.0014	0.0025	0.51242	0.00011	0.00011	-4.09652	2.1458	HM
I1_28	He4	1.32	0.348439	7.6e-05	0.30482	0.00069	0.0026	0.51295	0.00012	0.00013	6.24232	2.34087	HM
I1_29	He4	1.821	0.348429	5.2e-05	0.2476	0.0021	0.0029	0.51232	9.4e-05	9.9e-05	-6.04725	1.83368	IM
I1_30	He4	3.677	0.348426	3.5e-05	0.12485	0.0004	0.0011	0.512304	7e-05	7.6e-05	-6.35936	1.36551	IM
I1_31	He4	1.077	0.348398	7e-05	0.26242	0.00022	0.0021	0.51223	0.00015	0.00015	-7.8029	2.92609	IM
I1_33	He4	1.0412	0.348536	8.8e-05	0.27364	0.0007	0.0023	0.51255	0.00013	0.00013	-1.56058	2.53594	HM
I1_41	He4	2.551	0.348438	5e-05	0.15731	0.00018	0.0013	0.512389	8.5e-05	8.9e-05	-4.70125	1.65812	HM
I1_45	He4	1.755	0.348439	7e-05	0.26882	0.00055	0.0022	0.512661	7.5e-05	8e-05	0.604725	1.46304	HM
I1_48	He4	1.379	0.348436	7.2e-05	0.326	0.0031	0.0041	0.51249	0.00013	0.00013	-2.73101	2.53594	HM
I1_50	He4	0.6891	0.34846	0.00013	0.2658	0.0011	0.0024	0.51247	0.00019	0.00019	-3.12116	3.70638	HM
I1_51	He4	3.151	0.348383	4.8e-05	0.27346	0.00026	0.0022	0.512478	9.4e-05	9.8e-05	-2.9651	1.83368	HM
I1_52	He4	5.45	0.348429	2.9e-05	0.16806	0.00027	0.0014	0.512683	5.5e-05	6.3e-05	1.03388	1.0729	HM
I1_53	He4	1.816	0.348397	6.8e-05	0.0824	0.0011	0.0012	0.512316	9.8e-05	0.0001	-6.12528	1.91171	IM
I1_54	He4	1.679	0.34843	5.9e-05	0.3104	0.0031	0.0039	0.51271	0.0001	0.00011	1.56058	1.95072	HM
I1_61	He4	1.552	0.34844	7.5e-05	0.386	0.0022	0.0038	0.51245	0.00012	0.00013	-3.5113	2.34087	IM
I1_63	He4	3.56	0.348436	4.3e-05	0.32488	0.00032	0.0026	0.512763	5.9e-05	6.6e-05	2.59446	1.15093	HM
I1_67	He4	1.408	0.348463	7.5e-05	0.2607	0.0029	0.0036	0.51278	0.00014	0.00014	2.92609	2.73101	HM
I1_75	He4	4.35	0.348444	3.6e-05	0.27384	0.00052	0.0023	0.512649	6.6e-05	7.3e-05	0.370638	1.28748	HM
I1_78	He4	3.458	0.348422	4e-05	0.24825	0.0003	0.002	0.512426	8.6e-05	9.1e-05	-3.97948	1.67762	HM
I1_81	He4	2.205	0.34844	5.6e-05	0.27569	0.00072	0.0023	0.512184	9.1e-05	9.6e-05	-8.70023	1.77516	IM
I1_83	He4	1.277	0.348459	5.9e-05	0.272	0.001	0.0024	0.51258	0.00014	0.00015	-0.975362	2.73101	HM
I1_84	He4	0.7481	0.34837	0.0001	0.15904	0.00037	0.0013	0.51237	0.0002	0.0002	-5.07188	3.90145	UM
I1_87	He4	2.274	0.348387	4.1e-05	0.2654	0.0012	0.0025	0.512526	8.6e-05	9e-05	-2.02875	1.67762	HM
I1_91	He4	1.735	0.34843	5.9e-05	0.30633	0.00055	0.0025	0.512751	9.4e-05	9.8e-05	2.36038	1.83368	HM
I1_95	He4	1.5173	0.348347	7e-05	0.24997	0.00031	0.002	0.51257	9.4e-05	9.8e-05	-1.17043	1.83368	HM
I1_101	He4	1.815	0.348511	5.5e-05	0.2822	0.0015	0.0028	0.51264	0.0001	0.00011	0.195072	1.95072	HM
Z1_1	LPF3	1.146	0.348435	7.1e-05	0.26211	0.00072	0.0033	0.512153	9.8e-05	0.00011	-9.30496	1.91171	LM
Z1_2	LPF3	1.929	0.348398	4.4e-05	0.4117	0.0015	0.0053	0.512994	7.9e-05	9.2e-05	7.10064	1.54107	HM
Z1_3	LPF3	0.693	0.34828	0.00012	0.575	0.027	0.028	0.51254	0.00017	0.00017	-1.75565	3.31623	LM
Z1_4	LPF3	0.943	0.348385	7.8e-05	0.2876	0.0063	0.0072	0.51258	0.00012	0.00013	-0.975362	2.34087	HM
Z1_5	LPF3	2.688	0.348432	3.6e-05	0.3764	0.0024	0.0053	0.512447	6.1e-05	7.7e-05	-3.56983	1.18994	HM
Z1_6	LPF3	2.334	0.34842	3.8e-05	0.25983	0.00029	0.0033	0.512536	8.3e-05	9.5e-05	-1.83368	1.6191	HM
Z1_7	LPF3	0.867	0.3484	8.6e-05	0.3417	0.0014	0.0045	0.51281	0.00014	0.00014	3.5113	2.73101	HM
Z1_12	LPF3	1.777	0.348408	7.2e-05	0.22826	0.00027	0.0029	0.5123	0.00011	0.00012	-6.43739	2.1458	IM
Z1_13	LPF3	1.556	0.348442	5.2e-05	0.524	0.045	0.045	0.512418	9e-05	0.0001	-4.13554	1.75565	IM
Z1_14	LPF3	1.407	0.348408	5.2e-05	0.3894	0.006	0.0077	0.51231	0.0001	0.00011	-6.24232	1.95072	LM
Z1_16	LPF3	1.495	0.348385	6.3e-05	0.20743	0.00099	0.0028	0.51229	0.00011	0.00012	-6.63246	2.1458	IM
Z1_18	LPF3	1.403	0.348403	6.2e-05	0.26344	0.00067	0.0034	0.512234	8.4e-05	9.6e-05	-7.72487	1.63861	LM
Z1_19	LPF3	1.252	0.3484	6.8e-05	0.29803	8.5e-05	0.0037	0.5125	0.00011	0.00012	-2.53594	2.1458	IM
Z1_21	LPF3	0.905	0.348396	8.8e-05	0.15416	0.00037	0.002	0.51283	0.00013	0.00013	3.90145	2.53594	IM
Z1_22	LPF3	0.6865	0.34837	0.00011	0.2367	0.002	0.0036	0.51217	0.00015	0.00016	-8.97333	2.92609	IM
Z1_23	LPF3	1.338	0.348361	6.2e-05	0.4204	0.0019	0.0056	0.51242	0.00011	0.00012	-4.09652	2.1458	LM
Z1_25	LPF3	1.341	0.348379	6.6e-05	0.26499	0.00014	0.0033	0.51222	0.0001	0.00011	-7.99797	1.95072	LM
Z1_26	LPF3	2.223	0.348449	4.3e-05	0.4121	0.0016	0.0054	0.513064	7.9e-05	9.1e-05	8.46615	1.54107	HM
Z1_27	LPF3	2.375	0.348438	4e-05	0.3686	0.0003	0.0046	0.512386	6.5e-05	8e-05	-4.75977	1.26797	IM
Z1_29	LPF3	2.264	0.348427	4e-05	0.2393	0.0017	0.0034	0.512561	7.2e-05	8.6e-05	-1.346	1.40452	HM
Z1_30	LPF3	1.535	0.348449	5.6e-05	0.37288	0.00077	0.0047	0.512522	7.2e-05	8.6e-05	-2.10678	1.40452	HM
Z1_31	LPF3	0.843	0.348378	7.8e-05	0.22149	0.00079	0.0029	0.51229	0.00013	0.00014	-6.63246	2.53594	LM
Z1_32	LPF3	1.263	0.348441	5.6e-05	0.34725	0.00037	0.0043	0.512348	9.1e-05	0.0001	-5.50104	1.77516	LM
Z1_34	LPF3	4.746	0.348414	2.4e-05	0.16328	0.00027	0.0021	0.512337	4.4e-05	6.4e-05	-5.71562	0.858319	HM
Z1_35	LPF3	2.224	0.34845	4.6e-05	0.31424	0.00024	0.0039	0.512761	5.6e-05	7.3e-05	2.55545	1.09241	HM
Z1_36	LPF3	4.82	0.348416	2.4e-05	0.156	0.0019	0.0027	0.512287	4.5e-05	6.5e-05	-6.69099	0.877826	HM
Z1_37	LPF3	2.587	0.348414	4e-05	0.41519	0.00032	0.0052	0.512991	6.2e-05	7.8e-05	7.04212	1.20945	HM
Z1_38	LPF3	1.574	0.348439	5.8e-05	0.28904	0.00084	0.0037	0.51233	0.00011	0.00012	-5.85217	2.1458	IM
Z1_39	LPF3	1.255	0.348459	6.4e-05	0.27973	0.00017	0.0035	0.51217	0.00011	0.00012	-8.97333	2.1458	IM
Z1_40	LPF3	1.972	0.348445	4.3e-05	0.3266	0.0016	0.0044	0.512258	7.5e-05	8.9e-05	-7.2567	1.46304	IM
Z1_41	LPF3	2.662	0.348464	4e-05	0.3228	0.0016	0.0043	0.512752	5.7e-05	7.4e-05	2.37988	1.11191	HM
Z1_42	LPF3	1.082	0.348537	8.7e-05	0.33329	0.00052	0.0042	0.5124	0.00014	0.00015	-4.48667	2.73101	IM
Z1_45	LPF3	1.964	0.34844	3.9e-05	0.3527	0.002	0.0048	0.512347	7.5e-05	8.9e-05	-5.52055	1.46304	IM
Z1_46	LPF3	0.855	0.348316	8.7e-05	0.21535	0.00031	0.0027	0.51207	0.00014	0.00015	-10.9241	2.73101	IM
Z1_47	LPF3	1.852	0.348422	5.3e-05	0.22507	0.00046	0.0028	0.512128	8.7e-05	9.9e-05	-9.79264	1.69713	IM
H1_4	LPF3	3.266	0.348389	3e-05	0.15	0.00053	0.0019	0.512291	7.1e-05	8.5e-05	-6.61296	1.38501	HM
H1_5	LPF3	0.939	0.348439	7.9e-05	0.3047	0.001	0.0039	0.51255	0.00011	0.00012	-1.56058	2.1458	LM
H1_7	LPF3	2.05	0.348431	4.2e-05	0.3519	0.0032	0.0054	0.512437	8.5e-05	9.7e-05	-3.7649	1.65812	IM
H1_8	LPF3	1.85	0.34837	5e-05	0.3248	0.0012	0.0042	0.512689	8.2e-05	9.5e-05	1.15093	1.59959	HM
H1_9	LPF3	1.972	0.348512	5.1e-05	0.3349	0.0049	0.0065	0.512389	9.8e-05	0.00011	-4.70125	1.91171	LM
H1_11	LPF3	4.392	0.348401	2.8e-05	0.1312	0.00066	0.0018	0.512393	4.5e-05	6.5e-05	-4.62322	0.877826	IM
H1_13	LPF3	0.809	0.348429	9.4e-05	0.30527	0.00067	0.0039	0.51235	0.00016	0.00017	-5.46203	3.12116	LM
H1_14	LPF3	2.018	0.348308	7e-05	0.31267	0.00069	0.004	0.512424	8.5e-05	9.7e-05	-4.01849	1.65812	IM
H1_15	LPF3	0.5703	0.34843	0.00011	0.35227	0.00033	0.0044	0.51262	0.00018	0.00019	-0.195072	3.5113	LM
H1_16	LPF3	1.458	0.348436	6.4e-05	0.352705	9.7e-05	0.0044	0.51237	9.4e-05	0.0001	-5.07188	1.83368	IM
H1_17	LPF3	0.601	0.34837	0.00012	0.37341	0.00041	0.0047	0.51251	0.00019	0.0002	-2.34087	3.70638	LM
H1_18	LPF3	2.369	0.348497	4.3e-05	0.24684	0.00034	0.0031	0.512195	7.5e-05	8.8e-05	-8.48565	1.46304	IM
H1_21	LPF3	3.96	0.34842	2.9e-05	0.22006	0.00011	0.0027	0.51215	5.9e-05	7.6e-05	-9.36348	1.15093	IM
H1_22	LPF3	3.737	0.348422	3.1e-05	0.26518	0.00087	0.0034	0.512601	5e-05	6.8e-05	-0.56571	0.975362	HM
H1_24	LPF3	1.039	0.348404	9.7e-05	0.3508	0.0036	0.0057	0.51271	0.00015	0.00016	1.56058	2.92609	LM
H1_28	LPF3	1.497	0.348396	6.1e-05	0.3293	0.0011	0.0043	0.512673	8.9e-05	0.0001	0.838812	1.73614	HM
F1_1	LPF1	0.566	0.34844	0.00011	0.3125	0.0014	0.0041	0.51249	0.00019	0.00019	-2.73101	3.70638	LM
F1_3	LPF1	1.27	0.348297	9e-05	0.2514	0.0012	0.0034	0.51291	0.00014	0.00015	5.46203	2.73101	LM
F1_7	LPF1	1.54	0.348438	5.3e-05	0.236	0.0024	0.0038	0.512156	7.7e-05	9e-05	-9.24644	1.50206	HM
F1_9	LPF1	0.918	0.348276	7.6e-05	0.2819	0.001	0.0037	0.51316	0.00017	0.00018	10.3388	3.31623	LM
F1_10	LPF1	0.7042	0.34837	0.0001	0.2517	0.0013	0.0034	0.51284	0.00018	0.00018	4.09652	3.5113	LM
F1_15	LPF1	0.5756	0.34836	0.00012	0.37247	0.00055	0.0047	0.51229	0.00018	0.00019	-6.63246	3.5113	IM
F1_18	LPF1	0.786	0.34837	0.00012	0.33076	0.00072	0.0042	0.51205	0.00018	0.00019	-11.3142	3.5113	LM
F1_20	LPF1	0.8076	0.34837	0.0001	0.25208	0.00042	0.0032	0.51216	0.00017	0.00018	-9.16841	3.31623	LM
F1_23	LPF1	1.325	0.348366	8.3e-05	0.25179	0.00033	0.0032	0.51236	0.00012	0.00013	-5.26696	2.34087	HM
F1_25	LPF1	0.6201	0.34852	0.00012	0.46921	0.00044	0.0059	0.51278	0.00016	0.00016	2.92609	3.12116	LM
A1_1	LPF3	1.112	0.348336	6.2e-05	0.34693	0.00097	0.0044	0.51231	0.00012	0.00013	-6.24232	2.34087	LM
A1_2	LPF3	0.854	0.348412	8.6e-05	0.35833	0.00094	0.0046	0.51213	0.00016	0.00017	-9.75362	3.12116	LM
A1_3	LPF3	1.688	0.348415	5.1e-05	0.227418	7.4e-05	0.0028	0.512597	7.2e-05	8.6e-05	-0.643739	1.40452	HM
A1_4	LPF3	0.7705	0.348414	7.9e-05	0.26643	0.00048	0.0034	0.51233	0.00014	0.00015	-5.85217	2.73101	LM
A1_5	LPF3	0.7116	0.348253	9.4e-05	0.22505	0.00066	0.0029	0.51236	0.00016	0.00016	-5.26696	3.12116	LM
A1_7	LPF3	1.801	0.348424	4.7e-05	0.3372	0.0016	0.0045	0.51222	9.7e-05	0.00011	-7.99797	1.8922	IM
A1_9	LPF3	2.835	0.348407	3.8e-05	0.28967	0.00012	0.0036	0.51227	6.6e-05	8.1e-05	-7.02261	1.28748	IM
A1_10	LPF3	0.917	0.348338	7.8e-05	0.39262	0.00052	0.0049	0.51293	0.00013	0.00014	5.85217	2.53594	LM
A1_12	LPF3	0.532	0.34829	0.00012	0.30412	0.00069	0.0039	0.51251	0.00018	0.00018	-2.34087	3.5113	LM
A1_13	LPF3	2.456	0.348414	4.3e-05	0.20336	0.0004	0.0026	0.512484	6.2e-05	7.8e-05	-2.84806	1.20945	IM
A1_14	LPF3	1.0793	0.348424	7.7e-05	0.21957	0.00095	0.0029	0.51238	0.00012	0.00013	-4.87681	2.34087	LM
A1_16	LPF3	0.8472	0.34839	9.5e-05	0.27163	0.00017	0.0034	0.51237	0.00014	0.00015	-5.07188	2.73101	IM
A1_18	LPF3	2.705	0.348445	3.8e-05	0.2833	0.0017	0.0039	0.512244	5.7e-05	7.4e-05	-7.5298	1.11191	UM
A1_19	LPF3	1.206	0.348502	7e-05	0.34851	0.00033	0.0044	0.51247	0.00012	0.00012	-3.12116	2.34087	LM
A1_20	LPF3	2.643	0.34838	5.1e-05	0.15422	0.00011	0.0019	0.51239	9e-05	0.0001	-4.68174	1.75565	HM
A1_21	LPF3	1.389	0.348421	5.8e-05	0.27785	0.00028	0.0035	0.51237	0.0001	0.00011	-5.07188	1.95072	HM
A1_24	LPF3	3.393	0.348422	3.1e-05	0.2743	0.0011	0.0036	0.512089	5.3e-05	7.1e-05	-10.5534	1.03388	IM
A1_25	LPF3	1.233	0.348478	6.4e-05	0.24847	0.00055	0.0031	0.51245	0.00013	0.00014	-3.5113	2.53594	HM
A1_26	LPF3	2.29	0.34844	3.5e-05	0.2388	0.00025	0.003	0.512573	7.7e-05	9e-05	-1.11191	1.50206	HM
A1_28	LPF3	0.763	0.348418	8.7e-05	0.27116	0.0003	0.0034	0.51241	0.00015	0.00015	-4.29159	2.92609	IM
A1_29	LPF3	1.081	0.348448	7.6e-05	0.25338	0.00023	0.0032	0.51234	0.00014	0.00014	-5.6571	2.73101	IM
A1_31	LPF3	0.924	0.348342	7.6e-05	0.2735	0.00018	0.0034	0.51237	0.00012	0.00013	-5.07188	2.34087	IM
A1_32	LPF3	0.633	0.34842	0.0001	0.305	0.0021	0.0044	0.51257	0.00019	0.0002	-1.17043	3.70638	LM
A1_33	LPF3	1.228	0.348395	6.2e-05	0.260715	9.5e-05	0.0033	0.51239	0.0001	0.00011	-4.68174	1.95072	IM
A1_34	LPF3	2.862	0.348421	3.6e-05	0.153288	7e-05	0.0019	0.512314	6e-05	7.6e-05	-6.16429	1.17043	HM
				Accepted data with Nd_Nd_error <0.0004
